# Supplementary material
Source: PubMed Central journal article supplement (PMC4825121)
Supplement: supp_pp.16.00033_PP2016-00033DR1_Supplemental_Material.pdf [file supp_pp.16.00033_PP2016-00033DR1_Supplemental_Material.pdf]

## Supplemental Figure S2

| Genes                                                                      | Proteins                | dsDNA_bind |
|----------------------------------------------------------------------------|-------------------------|------------|
| PDCD5, <i>H.sapiens</i><br>programmed cell death 5                         | NP_004699.1<br>125 aa   |            |
| PDCD5, <i>P.troglodytes</i><br>programmed cell death 5                     | XP_512563.1<br>125 aa   |            |
| PDCD5, <i>M.mulatta</i><br>programmed cell death 5                         | XP_001086491<br>125 aa  |            |
| PDCD5, <i>C.lupus</i><br>programmed cell death 5                           | XP_00561635.1<br>111 aa |            |
| PDCD5, <i>B.taurus</i><br>programmed cell death 5                          | NP_001039489<br>125 aa  |            |
| Pdcd5, <i>M.musculus</i><br>programmed cell death 5                        | NP_062720.1<br>126 aa   |            |
| Gm3837, <i>M.musculus</i><br>predicted gene 3837                           | XP_00147806.1<br>126 aa |            |
| Pdcd5, <i>R.norvegicus</i><br>programmed cell death 5                      | NP_001099717<br>125 aa  |            |
| LOC100912106, <i>R. norvegicus</i><br>Programmed cell death protein 5-like | XP_003748886<br>125 aa  |            |
| PDCD5, <i>G.gallus</i><br>programmed cell death 5                          | NP_001264515<br>126 aa  |            |
| pdcd5, <i>X.tropicalis</i><br>programmed cell death 5                      | NP_001017011<br>125 aa  |            |
| pdcd5, <i>D.rerio</i><br>programmed cell death 5                           | NP_957471.1<br>128 aa   |            |
| PDCD5 <i>D.melanogaster</i><br>PDCD5                                       | NP_648848.1<br>133 aa   |            |
| AgaP_AGAP005432, <i>A.gambiae</i><br>AgaP_AGAP005432                       | XP_315439.4<br>129 aa   |            |
| D2005.3, <i>C.elegans</i><br>D2005.3                                       | NP_492159.2<br>130 aa   |            |
| SPAC23C4.09c, <i>S.pombe</i><br>SPAC23C4.09c                               | NP_593181.1<br>131 aa   |            |
| AT1G29850, <i>A.thaliana</i><br>AT1G29850                                  | NP_849728.1<br>130 aa   |            |
| Os05g0547850, <i>O.sativa</i><br>Os05g0547850                              | NP_001174513<br>128 aa  |            |

Representative scheme of the double strand DNA binding domain conserved in PDCD5 proteins from eukaryotic species. The scheme was obtained using the HomoloGene tool (NCBI) that identifies homologs among the annotated genes of several sequenced eukaryotic genomes. Double-stranded DNA-binding domain is represented by green (pfam01984) and pink (cl00928) boxes.

# Supplemental Figure S3

```
(I) 818pb          GGGTTTTTGAAGCATTTCCTTTTAGAGAAGAGAGCTGTGTTGGTTTTT 50
(II) 821pb          GGGTTTTTGAAGCATTTCCTTTTAGAGAAGAGAGCTGTGTTGGTTTTT 50
Genomic seq        GGGTTTTTGAAGCATTTCCTTTTAGAGAAGAGAGCTGTGTTGGTTTTT 50
(III) 823pb        GGGTTTTTGAAGCATTTCCTTTTAGAGAAGAGAGCTGTGTTGGTTTTT 50
                    *****

(I) 818pb          GAGGTAAAAGAAGAGACCCAATTCGATTGGAGGATAGAGACGAAGAAG 100
(II) 821pb          GAGGTAAAAGAAGAGACCCAATTCGATTGGAGGATAGAGACGAAGAAG 100
Genomic seq        GAGGTAAAAGAAGAGACCCAATTCGATTGGAGGATAGAGACGAAGAAG 100
(III) 823pb        GAGGTAAAAGAAGAGACCCAATTCGATTGGAGGATAGAGACGAAGAAG 100
                    *****

(I) 818pb          AAGACAGCTCCGATG----- 115
(II) 821pb          AAGACAGCTCCGATG----- 115
Genomic seq        AAGACAGCTCCGATGGTGAGTTTTTTTTGTCTCTAATTATTACCTTCT 150
(III) 823pb        AAGACAGCTCCGATG----- 115
                    *****

(I) 818pb          -----
(II) 821pb          -----
Genomic seq        TTCAATTTCCCTATATACGTTTAGGAACTCGAATTTTCTTAGGGT 200
(III) 823pb        -----

(I) 818pb          -----
(II) 821pb          -----
Genomic seq        TTTGGGCATTGAGTTGATTCGTTCCCTGCGTAACAATAATTTGAACTGTT 250
(III) 823pb        -----

(I) 818pb          -----
(II) 821pb          -----
Genomic seq        TGTGATTGGAACTGGGTTTCGCTTGAATTATATTTAAGTTTGATATCGC 300
(III) 823pb        -----

(I) 818pb          -----
(II) 821pb          -----
Genomic seq        TTAGAGTTTTGAAATTCATGATTGTTACTTTAGGGATTTGGATCAGTGGT 350
(III) 823pb        -----

(I) 818pb          -----
(II) 821pb          -----
Genomic seq        TCCGTCTTGGTGGATCTGTTTTAATTCTAGGTGGTGCCCTTTTTTCTGAA 400
(III) 823pb        -----

(I) 818pb          -----
(II) 821pb          -----
Genomic seq        TCTGTTTTGTTTGAATTGGTGTGTGATTCCATGTTAAAGTTCTTCATCTA 450
(III) 823pb        -----

(I) 818pb          -----
(II) 821pb          -----
Genomic seq        TATTTGTAATTATTCTATTGGATTATGTTGCTTTTGACATTGATCTTTG 500
(III) 823pb        -----

(I) 818pb          -----
(II) 821pb          -----
Genomic seq        CTTTAAATGATCTCTTTGTTGATTGGTTTTCTTCACAGGATTCTCTTCT 550
(III) 823pb        -----

(I) 818pb          -----
(II) 821pb          -----
Genomic seq        TTGTTTCATGGTTTATTCATGGTTCTTGAGTTGTATTACCGTTCAGTGAAA 600
(III) 823pb        -----
```

```

(I) 818pb -----
(II) 821pb -----
Genomic seq TCAACTCATTTGCTTTCACTTTGATATAAATTGAAATTGATGATCAAAATTA 650
(III) 823pb -----

(I) 818pb -----
(II) 821pb -----
Genomic seq TATTCATCTCTCTAATATAAATATCAACTCTGGCTACTTTCATTTTCATT 700
(III) 823pb -----

(I) 818pb -----
(II) 821pb -----
Genomic seq GCACTTTTAGTGTAGTGTGAATTATATGTGCTTCCATTTAGTAGGGCAGTG 750
(III) 823pb -----

(I) 818pb -----
(II) 821pb -----
Genomic seq GTTGTGGGTGTATTATGAAAAAATGGTCTAGGAAATGACGGAGTCGAC 800
(III) 823pb -----

(I) 818pb -----
(II) 821pb -----
Genomic seq TGTTTTTTTAGATGCAGTTGATAGATTAATCTTCAGTATAATGTTAGCCA 850
(III) 823pb -----

(I) 818pb -----
(II) 821pb -----
Genomic seq AAGATAATTCATCTTCAAATGTTAAAACACTGCATTTTTATGTTTATATT 900
(III) 823pb -----

(I) 818pb -----GCTGATCCTGAACTAGAAGCTATT 139
(II) 821pb -----GCTGATCCTGAACTAGAAGCTATT 139
Genomic seq TACTCCTTTTACTTCCTGTTCTGTAGGCTGATCCTGAACTAGAAGCTATT 950
(III) 823pb -----GCTGATCCTGAACTAGAAGCTATT 139
*****

(I) 818pb AGACAGAGGAGAATGCAAGAGCTCATGGCTCGACAAGGCAT----- 180
(II) 821pb AGACAGAGGAGAATGCAAGAGCTCATGGCTCGACAAGGCATG----- 181
Genomic seq AGACAGAGGAGAATGCAAGAGCTCATGGCTCGACAAGGCATGGTAATATT 1000
(III) 823pb AGACAGAGGAGAATGCAAGAGCTCATGGCTCGACAAGGCAT----- 181
*****

(I) 818pb -----
(II) 821pb -----
Genomic seq TAATACCTTAACTGACATCTGTTTTTCTCAAAAAGAAGTGACTTTGTG 1050
(III) 823pb -----

(I) 818pb -----GGGTAA 186
(II) 821pb -----CAGGGTAA 189
Genomic seq GCTCGTTTCCCTTTTAAGATCTTCACTAAACTGCATCATTAGCAGGGTAA 1100
(III) 823pb -----GGTAA 186
*****

(I) 818pb GCAGGGCAATCAGCAGAATCCAGAGCAAGAGAAACAGCAGGAAGATGCTA 236
(II) 821pb GCAGGGCAATCAGCAGAATCCAGAGCAAGAGAAACAGCAGGAAGATGCTA 239
Genomic seq GCAGGGCAATCAGCAGAATCCAGAGCAAGAGAAACAGCAGGAAGATGCTA 1150
(III) 823pb GCAGGGCAATCAGCAGAATCCAGAGCAAGAGAAACAGCAGGAAGATGCTA 236
*****

(I) 818pb AAAG----- 240
(II) 821pb AAAG----- 243
Genomic seq AAAGGTGTGTATCATTGTCTATTAGTTGACATGTATTATGTATATGAATT 1200
(III) 823pb AAAG----- 240
****

(I) 818pb -----
(II) 821pb -----
Genomic seq TGGAATTGTATATTTAAACTAATGTATTCTCTGATTGGAACATTCGTGTA 1250
(III) 823pb -----

```

```

(I) 818pb          -GGAAGCTGATGAACGTAGGCAAATGATGCTTAGTCAAGTATTGTCTTCT 289
(II) 821pb          -GGAAGCTGATGAACGTAGGCAAATGATGCTTAGTCAAGTATTGTCTTCT 292
Genomic seq        GGAAGCTGATGAACGTAGGCAAATGATGCTTAGTCAAGTATTGTCTTCT 1300
(III) 823pb        -GGAAGCTGATGAACGTAGGCAAATGATGCTTAGTCAAGTATTGTCTTCT 289
                    *****

(I) 818pb          CAAGCCCAGAGAGAGAA----- 305
(II) 821pb          CAAGCCCAGAGAGAGAA----- 308
Genomic seq        CAAGCCCAGAGAGAGAAAGTAAGTCTCATCTAAAAATGTGTGGAGTTCATC 1350
(III) 823pb        CAAGCCCAGAGAGAGAA----- 305
                    *****

(I) 818pb          -----
(II) 821pb          -----
Genomic seq        TAGTTACTCTCCCTTTCTTCTTCATTATGTCATTATTATATCTTTTATGT 1400
(III) 823pb        -----

(I) 818pb          -----TTGCTCGAATTGCTCTGGTGAAAC 329
(II) 821pb          -----TTGCTCGAATTGCTCTGGTGAAAC 332
Genomic seq        TTCTCTTTCTTTCTTTTTCGATAGTTGCTCGAATTGCTCTGGTGAAAC 1450
(III) 823pb        -----TTGCTCGAATTGCTCTGGTGAAAC 329
                    *****

(I) 818pb          CTGAGAAAAGCTAGAGGTGTGGAGGATGTTATTTTGAGGGCTGCTCAGATG 379
(II) 821pb          CTGAGAAAAGCTAGAGGTGTGGAGGATGTTATTTTGAGGGCTGCTCAGATG 382
Genomic seq        CTGAGAAAAGCTAGAGGTGTGGAGGATGTTATTTTGAGGGCTGCTCAGATG 1500
(III) 823pb        CTGAGAAAAGCTAGAGGTGTGGAGGATGTTATTTTGAGGGCTGCTCAGATG 379
                    *****

(I) 818pb          GGACAGATAGTTGAGAAG----- 397
(II) 821pb          GGACAGATAGTTGAGAAG----- 400
Genomic seq        GGACAGATAGTTGAGAAGGTAAAAAATTCAGTCACCTTCAATGTCATA 1550
(III) 823pb        GGACAGATAGTTGAGAAG----- 397
                    *****

(I) 818pb          -----
(II) 821pb          -----
Genomic seq        GTTCAGAATTCTTACACATCATATGGTTTCTACTCAAGTGCCGCTGGTAC 1600
(III) 823pb        -----

(I) 818pb          -----
(II) 821pb          -----
Genomic seq        TACACGAGTGTTATGCATCAAAGAGTTCGTGAAGTATACTCTGTTTGCTT 1650
(III) 823pb        -----

(I) 818pb          ----GTTTCTGAGGAACGGCTTATAACACTGTTGGAACAAATAAACAGC 442
(II) 821pb          ----GTTTCTGAGGAACGGCTTATAACACTGTTGGAACAAATAAACAGC 445
Genomic seq        TACAGGTTTCTGAGGAACGGCTTATAACACTGTTGGAACAAATAAACAGC 1700
(III) 823pb        ----GTTTCTGAGGAACGGCTTATAACACTGTTGGAACAAATAAACAGC 442
                    *****

(I) 818pb          CAAACTACCAAGCAAACGAAAGTCACG----- 469
(II) 821pb          CAAACTACCAAGCAAACGAAAGTCACG----- 472
Genomic seq        CAAACTACCAAGCAAACGAAAGTCACGGTAAGGTCACACAATCCTCAAAA 1750
(III) 823pb        CAAACTACCAAGCAAACGAAAGTCACGGTAAG----- 474
                    *****

(I) 818pb          -----
(II) 821pb          -----
Genomic seq        ACACAAGTTATTAAAGCAAAGTCCTTGCTCTTATCTTAACCATCGATATC 1800
(III) 823pb        -----

(I) 818pb          -----TACCAA 475
(II) 821pb          -----TACCAA 478
Genomic seq        ATTGAGTGTAATTTGATCTCGGATATTTATCTTCACTCGTGTAGTACCAA 1850
(III) 823pb        -----TACCAA 480
                    *****

(I) 818pb          CGGCGCCGTGGGGTGGACGACGATTAGGAAGGAAGAAGATATTATGATG 525
(II) 821pb          CGGCGCCGTGGGGTGGACGACGATTAGGAAGGAAGAAGATATTATGATG 528
Genomic seq        CGGCGCCGTGGGGTGGACGACGATTAGGAAGGAAGAAGATATTATGATG 1900
(III) 823pb        CGGCGCCGTGGGGTGGACGACGATTAGGAAGGAAGAAGATATTATGATG 530
                    *****

```

|               |                                                     |      |
|---------------|-----------------------------------------------------|------|
| (I) 818pb     | TGCTTTGTATATCTATGGAGATCTCACTGTTATGTTAGTGAGTTCACCTTA | 575  |
| (II) 821pb    | TGCTTTGTATATCTATGGAGATCTCACTGTTATGTTAGTGAGTTCACCTTA | 578  |
| Genomic seq   | TGCTTTGTATATCTATGGAGATCTCACTGTTATGTTAGTGAGTTCACCTTA | 1950 |
| (III) 823pb   | TGCTTTGTATATCTATGGAGATCTCACTGTTATGTTAGTGAGTTCACCTTA | 580  |
|               | *****                                               |      |
| (I) 818pb     | AGATCTACTTAAATGTTTCTGTTCAATATGTTTATTGTGAGTGAATCTTG  | 625  |
| (II) 821pb    | AGATCTACTTAAATGTTTCTGTTCAATATGTTTATTGTGAGTGAATCTTG  | 628  |
| Genomic seq   | AGATCTACTTAAATGTTTCTGTTCAATATGTTTATTGTGAGTGAATCTTG  | 2000 |
| (III) 823pb   | AGATCTACTTAAATGTTTCTGTTCAATATGTTTATTGTGAGTGAATCTTG  | 630  |
|               | *****                                               |      |
| (I) 818pb     | ATTATCTTCCAAACACTTGGGATGAGATTAAGCAATCTGAAACTGAAGC   | 675  |
| (II) 821pb    | ATTATCTTCCAAACACTTGGGATGAGATTAAGCAATCTGAAACTGAAGC   | 678  |
| Genomic seq   | ATTATCTTCCAAACACTTGGGATGAGATTAAGCAATCTGAAACTGAAGC   | 2050 |
| (III) 823pb   | ATTATCTTCCAAACACTTGGGATGAGATTAAGCAATCTGAAACTGAAGC   | 680  |
|               | *****                                               |      |
| (I) 818pb     | TCTACATTTTTATTTTTGGCATTTCCTCTGTGTGATCTATCTCCATCTTC  | 725  |
| (II) 821pb    | TCTACATTTTTATTTTTGGCATTTCCTCTGTGTGATCTATCTCCATCTTC  | 728  |
| Genomic seq   | TCTACATTTTTATTTTTGGCATTTCCTCTGTGTGATCTATCTCCATCTTC  | 2100 |
| (III) 823pb   | TCTACATTTTTATTTTTGGCATTTCCTCTGTGTGATCTATCTCCATCTTC  | 730  |
|               | *****                                               |      |
| (I) 818pb     | GTCTCTCTCCCATGCGCTGTTATGATTGAAATATTATTAGAAAGAAAAA   | 775  |
| (II) 821pb    | GTCTCTCTCCCATGCGCTGTTATGATTGAAATATTATTAGAAAGAAAAA   | 778  |
| Genomic seq   | GTCTCTCTCCCATGCGCTGTTATGATTGAAATATTATTAGAAAGAAAAA   | 2150 |
| (III) 823pb   | GTCTCTCTCCCATGCGCTGTTATGATTGAAATATTATTAGAAAGAAAAA   | 780  |
|               | *****                                               |      |
| (I) 818pb     | TGGTTCTGTTCTAATTGTAATTCATAAAAATTGATGTTGTTA          | 818  |
| (II) 821pb    | TGGTTCTGTTCTAATTGTAATTCATAAAAATTGATGTTGTTA          | 821  |
| Genomic seq   | TGGTTCTGTTCTAATTGTAATTCATAAAAATTGATGTTGTTA          | 2193 |
| (III) 823pb b | TGGTTCTGTTCTAATTGTAATTCATAAAAATTGATGTTGTTA          | 823  |
|               | *****                                               |      |

Alignment of the *AtPDCD5* genomic sequence with the three *AtPDCD5* mRNA spliced forms. Matches are indicated by an asterisk (\*), sequence differences between the mRNA spliced forms are marked in gray.

## Supplemental Figure S4

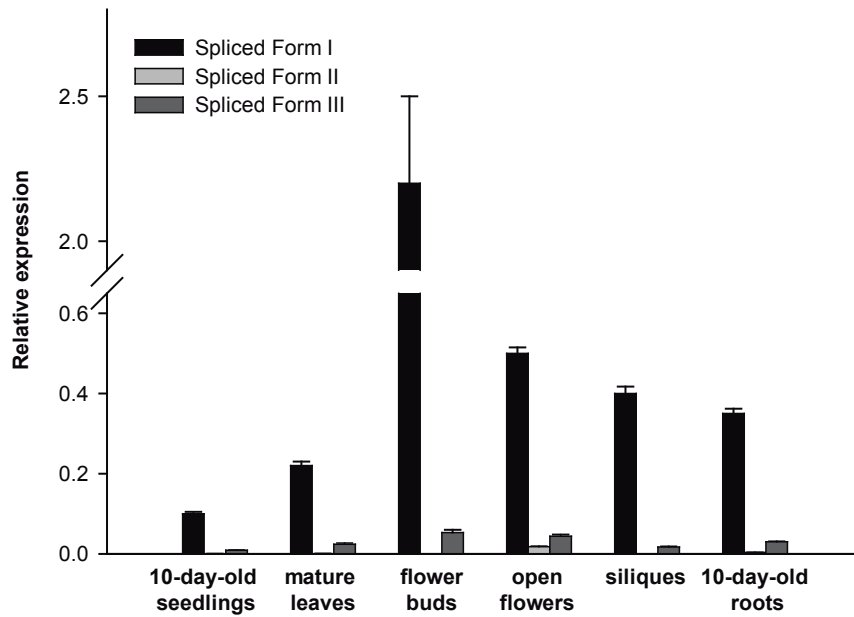

*AtPDCD5* spliced forms I, II and III expression analysis in Arabidopsis. *AtPDCD5* spliced forms expression levels in different Arabidopsis tissues determined by qRT-PCR. The relative *AtPDCD5* spliced forms I, II and III transcript abundance was analyzed in seedlings (10-day-old), mature leaves (28-day-old), flower buds, open flowers, siliques and roots (10-day-old). The means of the results obtained using three independent RNAs as a template are shown, the error bars indicate the S.D. of the samples. Each reaction was normalized using the Ct values corresponding to the *UBQ10* mRNA.

## Supplemental Figure S5

A

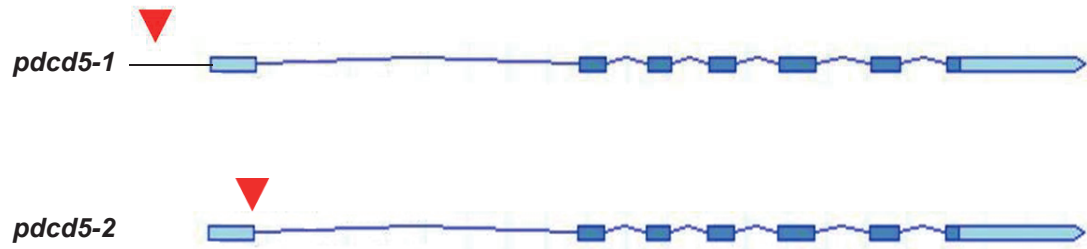

B

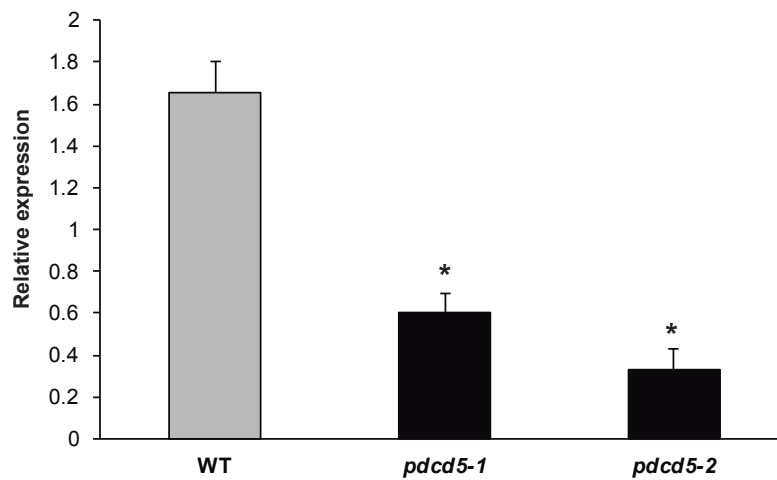

Characterization of *pcd5* mutant lines. (A) Structure of *A. thaliana* *PDCD5* gene. Boxes indicate exons (coding regions are in blue, while 5' and 3'UTRs are in light blue), and blue and black lines represent introns and promoter regions, respectively. The open triangles show the T-DNA positions. (B) *PDCD5* transcript abundance in T-DNA lines and wild-type (WT) plants analyzed by qRT-PCR. The means of the results obtained using three independent RNAs as a template are shown, the error bars indicate the S.D. of the samples. Each reaction was normalized using the  $C_t$  values corresponding to the *UBQ10* mRNA. For each *pcd5* mutant line analyzed, asterisks over the bars indicate statistically significant differences between wild type and *pcd5* mutant plants applying Student's *t*-test ( $P < 0.05$ ).



## Supplemental Figure S6

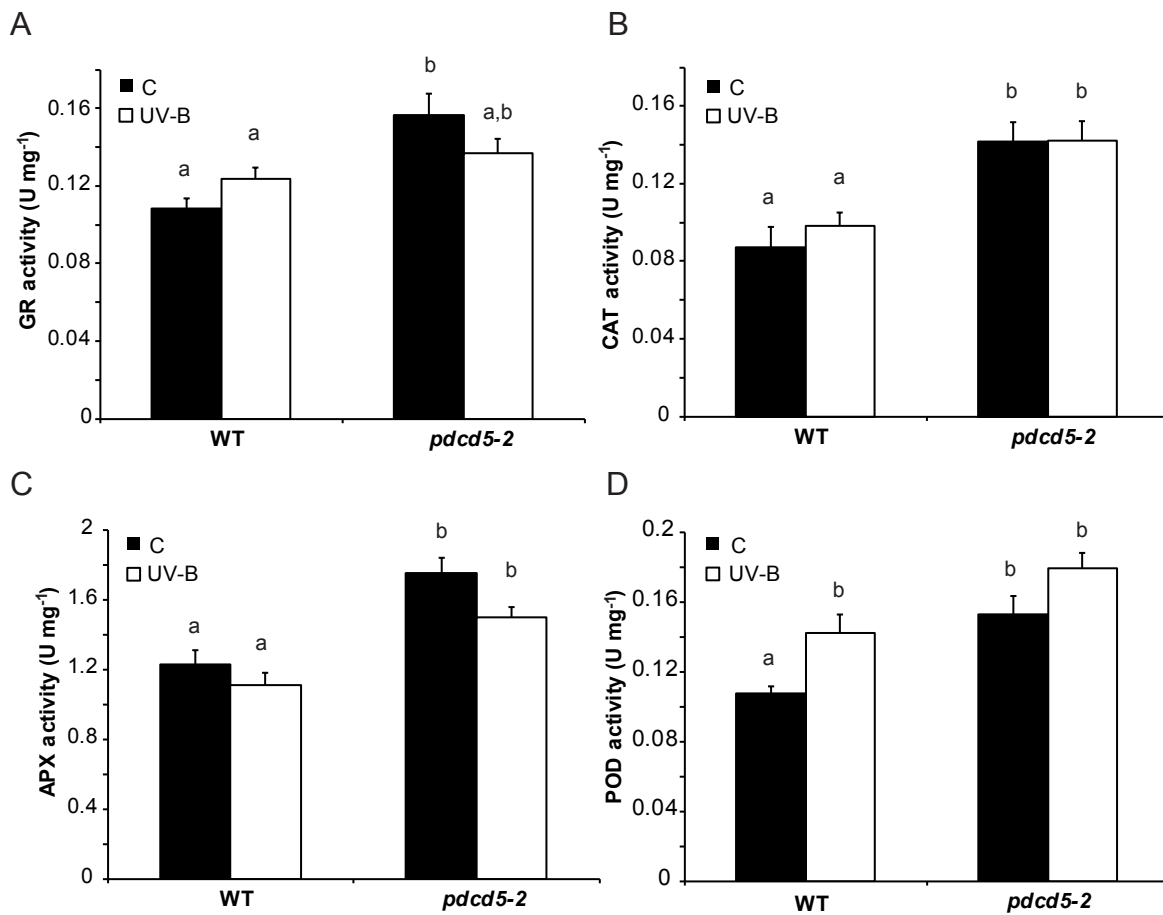

Analysis of antioxidant enzyme activities in wild type (WT, Col-0) and *pdc5* mutant plants under control conditions and after UV-B treatment. Glutathione reductase (GR) (A), catalase (CAT) (B), ascorbate peroxidase (APX) (C) and peroxidase (POD) (D) activities were determined under control conditions (C) and after a 4h-UV-B treatment at an intensity of 0.2 W m<sup>-2</sup>. Results represent the average  $\pm$  S.E.M. of three independent biological replicates. Statistical significance was analyzed using ANOVA, for each sample analyzed, different letters indicate significant difference with  $P < 0.01$ .

## Supplemental Figure S7

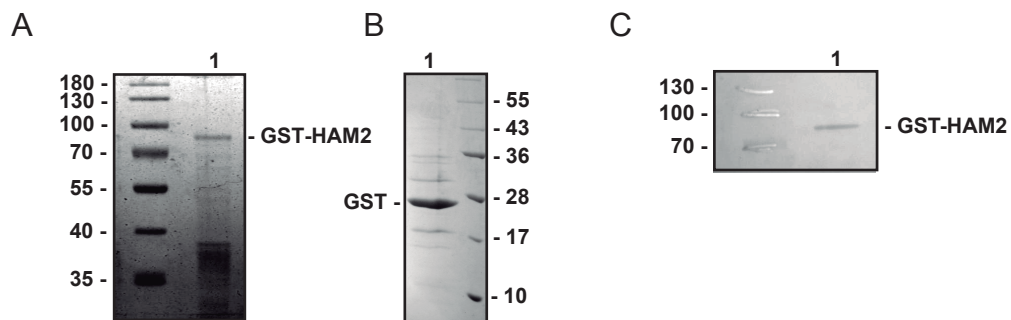

Recombinant expression of GST-AtHAM2 and GST proteins. (A) SDS-PAGE analysis (10%) of the recombinant purified GST-AtHAM2 fusion protein (lane 1, 3 µg). (B) SDS-PAGE analysis (15%) of the recombinant purified GST protein (lane 1, 6 µg). (C) Immunoblot analysis of the recombinant purified GST-AtHAM2 fusion protein (lane 1) using anti-GST antibodies. One µg of the purified protein was loaded. The numbers on the sides of gels indicate the molecular mass in kDa.

## Supplemental Figure S8

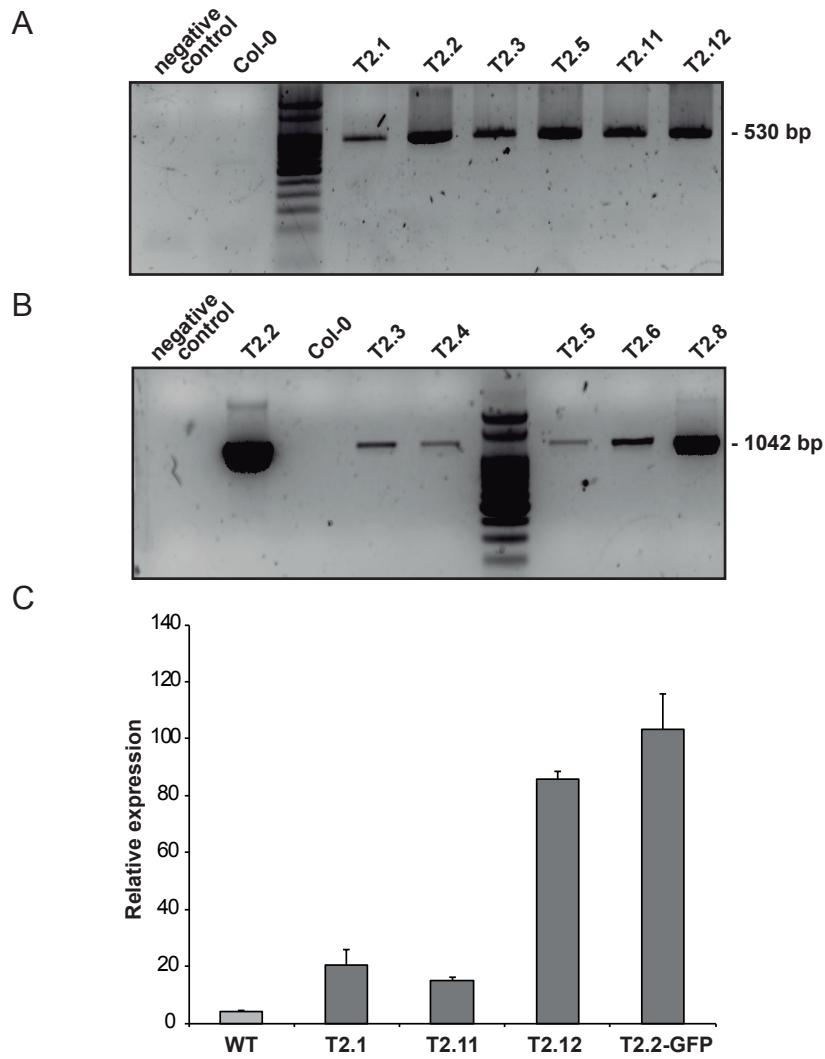

Analysis of Arabidopsis transgenic plants expressing *AtPDCD5-GFP* and *AtPDCD5*. The presence of the *Pro<sub>35S</sub>:AtPDCD5* (A) and *Pro<sub>35S</sub>:AtPDCD5-GFP* (B) transgenes was analyzed by PCR on genomic DNA from non-transformed plants (WT, Col-0) and six independent lines (indicated by numbers) for each *Pro<sub>35S</sub>:AtPDCD5* and *Pro<sub>35S</sub>:AtPDCD5-GFP* transgenic plants. The negative control was done without genomic DNA. Positive PCR reactions amplified 530 and 1042 bp products for *Pro<sub>35S</sub>:AtPDCD5* (A) and *Pro<sub>35S</sub>:AtPDCD5-GFP* (B) transgenic plants, respectively. (C) Transcript levels of *AtPDCD5* in transgenic plants analyzed by qRT-PCR, the expression level of *AtPDCD5* in wild type plants (WT, Col-0) is shown. Each reaction was normalized using the  $C_t$  values corresponding to the *UBQ10* mRNA.

Supplemental Figure S9

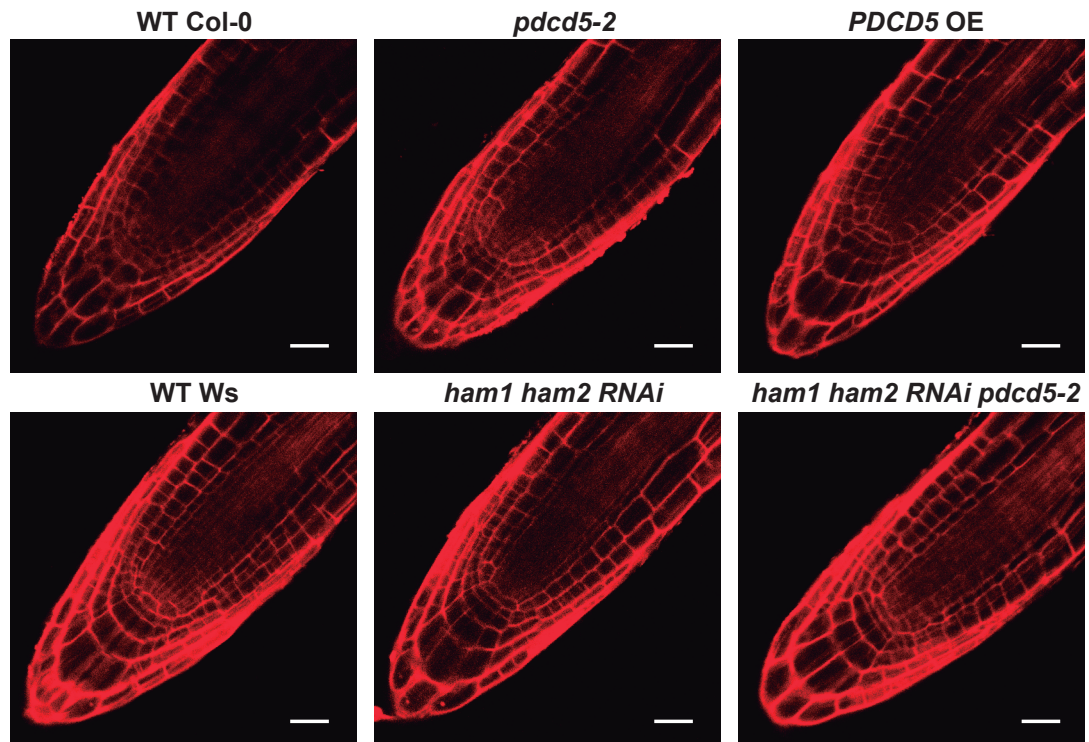

Images of root tips from WT (Col-0, Ws), *pdcd5-2*, *ham1ham2* RNAi, and *ham1ham2* RNAi/*pdcd5* mutants and *PDCD5* overexpressing plants (*PDCD5* OE) under control conditions (C) without UV-B. Bar corresponds to 50 μm.

## Supplemental Figure S10

A

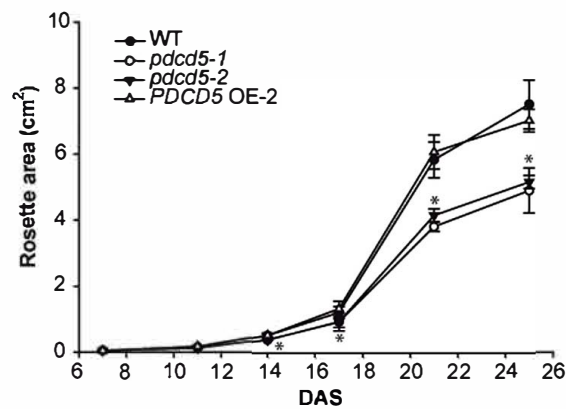

B

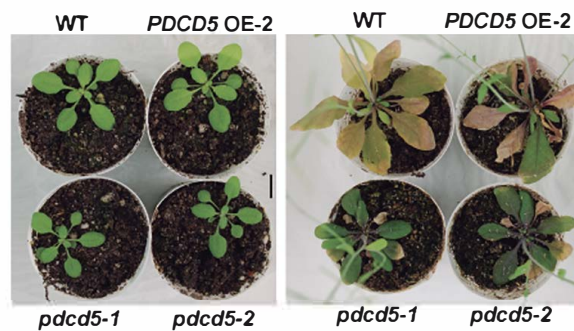

C

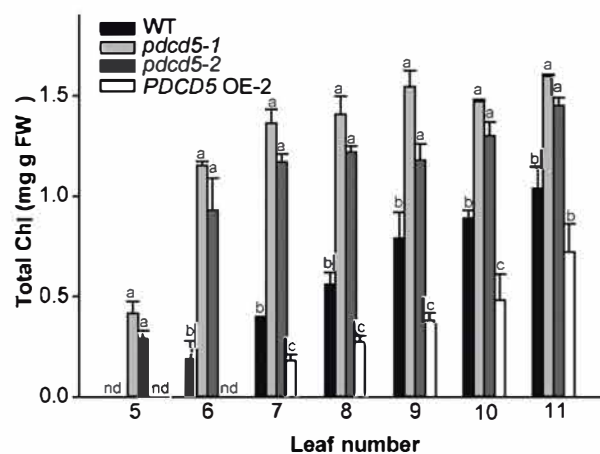

Phenotypic analysis of *pcd5* mutants and transgenic *PDCD5* OE plants. (A) Rosette area of *pcd5* mutants and transgenic *PDCD5* OE plants measured every 3-4 days from day 7-25 after stratification (DAS). Asterisks indicate statically significant differences (P < 0.01, one-way Anova test). (B) Col-0 (WT), *pcd5-1*, *pcd5-2* mutants and *PDCD5* OE plants at 21 (left) and 40 (right) DAS. Scale bar: 1 cm. (C) Total chlorophyll content in leaves of Col-0 (WT), *pcd5-1*, *pcd5-2* mutants and *PDCD5* OE plants at 40 DAS. For each leaf, statically significant differences between plants are marked with different letters (P < 0.05, one-way ANOVA test).

## Supplemental Figure S11

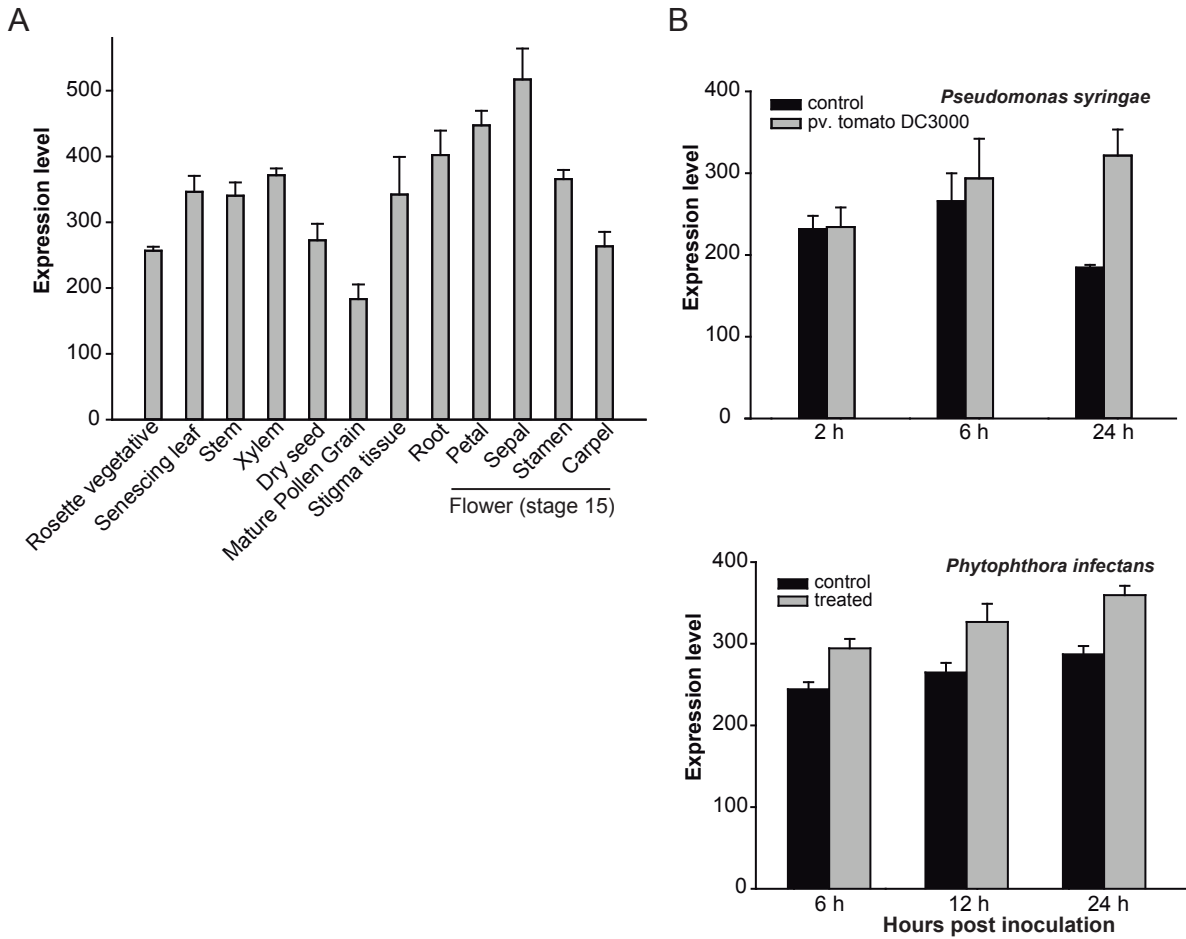

Relative expression level of *AtPDCD5* in different tissues (A) and in leaves from plants exposed infected with *Pseudomonas syringae* and *Phytophthora infestans*, (B). Microarrays data were retrieved from the Arabidopsis electronic Fluorescent Pictograph (eFP) Browser (Winter et al., 2007).

**Supplemental Table S1.** Primers used for cloning, RT-qPCR and screening.

| Name                                    | Sequence                                     |
|-----------------------------------------|----------------------------------------------|
| <i>F-BamHI-PDCD5-OE</i>                 | 5'GAGTACGGATCCATGGCTGATCCTGAACTA3'           |
| <i>R-Sall-PDCD5-OE</i>                  | 5'CGCGGCGTCGACTTAAGTGAACCTACTAAC3'           |
| <i>F-Kpn-PDCD5-GFP</i>                  | 5'GAGTACGGTACCATGGCTGATCCTGAACTA3'           |
| <i>R-BamHI-PDCD5-GFP</i>                | 5'TATGGATCCATCGTCGTCCACCCCACGGCG3'           |
| <i>F-AtPDCD5-1</i>                      | 5'GGCTCGACAAGGCATGGG3'                       |
| <i>R-AtPDCD5-1</i>                      | 5'ACGGCGCCGTTGGTACGT3'                       |
| <i>F-AtPDCD5-2</i>                      | 5'GGCTCGACAAGGCATGCA3'                       |
| <i>R-AtPDCD5-2</i>                      | 5'CGGCGCCGTTGGTACTTAC3'                      |
| <i>F-AtPDCD5-sc</i>                     | 5'TTCCCTGAGACGAATCCA3'                       |
| <i>R-AtPDCD5-sc</i>                     | 5'CGCAGGAACGAAATCAAC3'                       |
| <i>35S<sub>prom</sub></i>               | 5'GAGGAGCATCGTGGAAAAAGA3'                    |
| <i>R-GFP</i>                            | 5'CTGCAGTCAAGCTTTGTATAGTTCATC3'              |
| <i>F-HindIII-AtPDCD5<sub>prom</sub></i> | 5'GCGAAGCTTCCCCTTGAAGTCTTAC3'                |
| <i>R-BamHI-AtPDCD5<sub>prom</sub></i>   | 5'CGGGGATCCAAAAAACTCACCATC3'                 |
| <i>F-AtHAM2-EcoRI</i>                   | 5'CACCAGAATTCATGGGATCGTCAGCGAATACAGAAACCAA3' |
| <i>R-AtHAM2-XhoI</i>                    | 5TGTCACTCGAGTTAACTCTGGTCCTTGTAAGGTGTCCAA3'   |
| <i>F-AtUBQ10</i>                        | 5'AAGCAGCTTGAGGATGGAC3'                      |
| <i>R-AtUBQ10</i>                        | 5'AGATAACAGGAACGGAAACATAGT3'                 |
| <i>F-AtCDPK3</i>                        | 5'-CGCTGAGAACCCTTTCTGAAG-3'                  |
| <i>R-AtCDPK3</i>                        | 5'-CCATCTCCATCCATATCAGC-3'                   |
| <i>LB-SALK</i>                          | 5'-GTCCGCAATGTGTTATTAAGTTGTC-3'              |
| <i>F-AtUVR2</i>                         | 5'-GACCCGAGTGGATATGTTGG-3'                   |
| <i>R-AtUVR2</i>                         | 5'-GAGCTGTTCTTCAGCTTTCC-3'                   |
| <i>F-AtUVR7</i>                         | 5'-TACATTCGGGTCTCTTGCTC-3'                   |
| <i>R-AtUVR7</i>                         | 5'-TCCTCGTCTTCTTCAACAGG-3'                   |
| <i>F-AtUVH6</i>                         | 5'-CAAAGGCTGATTATGGGATG-3'                   |
| <i>R-AtUVH6</i>                         | 5'-CACCAGTCTCAGCCATCTTC-3'                   |
